# Research Article

## **Assessment of a loop-mediated isothermal amplification (LAMP) assay for the rapid detection of pathogenic bacteria from respiratory samples in patients with hospital-acquired pneumonia**

Andrea Vergara<sup>1\*</sup>, Hervé Boutal<sup>2\*</sup>, Adrián Ceccato<sup>3</sup>, Míriam López<sup>1</sup>, Adrià Cruells<sup>4</sup>, Leticia Bueno-Freire<sup>3</sup>, Javier Moreno<sup>5</sup>, Jorge Puig de la Bellacasa<sup>1</sup>, Pedro Castro<sup>4,6</sup>, Antoni Torres<sup>3,4,7</sup>, Francesc Marco<sup>1,5</sup>, Climent Casals-Pascual<sup>1,5</sup>, Jordi Vila<sup>1,5</sup>#.

<sup>1</sup> Department of Clinical Microbiology, CDB, Hospital Clínic of Barcelona – University of Barcelona – Barcelona, Spain.

<sup>2</sup> Service de Pharmacologie et Immunoanalyse (SPI), CEA, INRA, Laboratoire d’Etudes et de Recherches en Immunanalyse, Université Paris-Saclay, F-91191, Gif-sur-Yvette, France.

<sup>3</sup> Pulmonary and Critical Care Unit, Respiratory Institute, Hospital Clinic, Barcelona.

<sup>4</sup> Department of Medicine, School of Medicine, University of Barcelona, Barcelona.

<sup>5</sup> Institute for Global Health (ISGlobal), Barcelona, Spain.

<sup>6</sup> Medical Intensive Care Unit, Hospital Clínic, Barcelona

<sup>7</sup> Biomedical Research Centre in Respiratory Diseases (CibeRes, CB06/06/0028), Institut d’Investigacions Biomèdiques Agust Pi i Sunyer (IDIBAPS), Barcelona.

\*These authors contributed equally to this work.

#Address correspondence to Jordi Vila, [jvila@clinic.cat](mailto:jvila@clinic.cat).

24 **Running Head:** LAMP to detect bacteria in respiratory samples

25

26 **Keywords:** loop-mediated isothermal amplification (LAMP); hospital-acquired pneumonia (HAP);  
27 diagnostic techniques, respiratory system, critical care.

## Abstract

**Introduction.** Hospital-acquired pneumonia (HAP) is the one that presents clinically two or more days after admission into the hospital. Rapid identification of the causative agent of HAP will allow an earlier administration of a more appropriate antibiotic therapy and could lead to an improved outcome of patients with HAP.

**Methods.** First of all, a rapid procedure (< 30 min) to extract the DNA from bronchoalveolar lavage (BAL), endotracheal aspirate (EA) or bronchoaspirate (BAS) was set up. A loop-mediated isothermal amplification reaction (LAMP) specific for *Staphylococcus aureus*, *Escherichia coli*, *Klebsiella pneumoniae*, *Pseudomonas aeruginosa*, *Stenotrophomonas maltophilia* and *Acinetobacter baumannii* was carried out with the extracted solution. The reaction was performed at 65°C for 30-40 min. LAMP was compared with bacterial culture method.

**Results.** Overall, 58 positive BAL and 83 EA/BAS samples were tested. The limits of detection varied according to the microorganism detected and to the respiratory sample analyzed. Validation of the LAMP assay with BAL samples showed that the assay was 100% specific and 86.3% sensitive (positive predictive value of 100% and a negative predictive value of 50%). Meanwhile for BAS/EA samples, the assay rendered the following statistical parameters: 100% specificity, 94.6% sensitivity, 100% positive predictive value and 69.2% negative predictive value. These scores were obtained including minor errors as correct. The turnaround time including preparation of the sample and LAMP was circa 1 hour.

**Conclusions.** LAMP method may be used to detect the most frequent bacteria causing HAP. It is a simple, cheap, sensitive, specific and rapid assay.

## 49 Introduction

50 Hospital-acquired pneumonia (HAP) is the one that presents clinically two or more days  
 51 after hospitalization and includes ventilator-associated pneumonia (VAP), which is defined as  
 52 pneumonia that presents after 48 hours with endotracheal intubation (1). Patients with VAP  
 53 present longer periods with mechanical ventilation, as well as longer stay in the ICU and in the  
 54 hospital (2). It is estimated that approximately 10-40% of the patients undergoing mechanical  
 55 ventilation for more than two days will develop VAP (2), with great differences among countries,  
 56 type of patient, and type of intensive care unit (ICU). The implementation of different preventive  
 57 strategies enabled a decrease in VAP cases, but it is still a very important problem among  
 58 ventilated patients (3).

59 VAP is frequently caused by Gram-negative aerobic bacteria (4–6), such as *Pseudomonas*  
 60 *aeruginosa*, *Klebsiella pneumoniae* and *Acinetobacter* spp; while *Staphylococcus aureus* is the  
 61 most frequent Gram-positive pathogen (7). In addition, the VAP can be polymicrobial, which  
 62 complicates diagnosis and treatment. Regarding viruses, virus herpes simplex (HSV) (8) and  
 63 cytomegalovirus (CMV) (9) can be reactivated in critical care patients and cause VAP. It should be  
 64 noted that many of the pathogens causing VAP may present high levels of antibiotic resistance (2,  
 65 7).

66 Unfortunately, the diagnosis of VAP is complicated and there is no a reliable reference test  
 67 (10). The signs and symptoms of pneumonia, such as fever, tachycardia, leukocytosis and purulent  
 68 secretions, are frequent in patients with mechanical ventilation and are not specific to VAP.  
 69 Moreover, radiographic changes are difficult to interpret in this group of patients. Therefore, it is  
 70 necessary to confirm the clinical suspicion of VAP through the microbiological culture of  
 71 pulmonary secretions. However, the microbiological diagnosis also has several limitations: 1)  
 72 difficulty to differentiate between colonization and infection; 2) non-homogeneous distribution of

the infection in the lung; and 3) negative cultures due to previous empirical antibiotic treatment. Empirical treatment is usually initiated in patients with suspected VAP before having the definitive diagnosis (11), since early and adequate treatment decreases the mortality (12). However, the indiscriminate administration of antibiotics exposes patients to unnecessary side effects, increases health care costs and favors the appearance of antibiotic resistance. Hence, the importance of knowing if there is an infection or not and the identification of the etiological agent (2).

The application of rapid diagnostic techniques to identify microbial pathogens seems to have a huge impact in the treatment of VAP, reducing inappropriate or unnecessary antimicrobial treatments and mortality in these patients (13, 14). Molecular biology techniques have allowed a faster diagnosis of VAP, especially in viral infections. They have the advantage of being faster than culture, allowing the detection of the causative agents even though the patient is receiving antibiotics and being able to quantify the bacterial concentration in the sample. On the other hand, in general they are relatively expensive techniques and detect a limited number of microorganisms.

The reaction based on the loop-mediated isothermal amplification (LAMP), developed in 2000 by Notomi *et al.* (15), is a rapid, simple, cheap and constant temperature nucleic acid amplification method. This method is very sensitive and specific, and there are numerous publications regarding its use in a wide range of applications (16). LAMP has been used to identify respiratory pathogens, with promising results (17, 18). The purpose of this study was to develop and evaluate a rapid protocol to identify the main microorganisms involved in HAP by LAMP directly from respiratory samples.

## 94 **Material and Methods**

### 95 ***Study design***

96 We developed a rapid protocol to identify by LAMP six different bacteria (*P. aeruginosa*,  
97 *Acinetobacter baumannii*, *K. pneumoniae*, *Escherichia coli*, *S. aureus* and *Stenotrophomonas*  
98 *maltophilia*) and evaluated its performance compared to culture. We used three different types of  
99 samples: bronchoalveolar lavage (BAL), endotracheal aspirate (EA) and bronchoaspirate (BAS).  
100 Two different protocols were optimized and used to deal with the different consistencies of the  
101 samples processed (aspirates being more difficult to work with due to sample thickness).

### 102 ***Collection of samples***

103 Positive and negative BAL, EA and BAS samples were collected from the Clinical  
104 Microbiology Laboratory at the Hospital Clinic of Barcelona (Spain), after being processed for  
105 routine techniques. The microbiological result was collected, including Gram stain and culture  
106 result. BAL collected during two-year period (2016/17) and EA/BAS during six months (January to  
107 June 2018) were stored at -80°C until use. To standardize the protocol, negative samples were  
108 mixed to obtain a homogeneous matrix. Aliquots of this homogeneous negative sample was  
109 spiked with different microorganisms and used to determine the limits of detection for each  
110 microorganism.

### 111 ***Routine microbiological methods***

112 Respiratory samples were collected in sterile containers and transported to the laboratory  
113 in less than two hours. Gram staining of the samples in the area of maximal purulence was  
114 examined for leukocytes and epithelial cells. Only respiratory samples with Murray–Washington  
115 classification degrees of IV (10–25 epithelial cells and >25 leukocytes per field using a low  
116 magnification lens (x100)), V (≤10 epithelial cells and >25 leukocytes) or VI (≤10 epithelial cells and

≤10 leukocytes) were processed for culture. Specimens not fulfilling these criteria were not considered to be representative of distal airways and were not processed for culture.

Good-quality respiratory specimens were quantitatively plated on blood and chocolate agar. Isolated bacteria were identified by matrix-assisted laser desorption/ionization time-of-flight mass spectrometry (MALDI-TOF MS) (Bruker Daltonics, Bremen, Germany). Susceptibility testing was performed according to EUCAST guidelines ([www.eucast.org](http://www.eucast.org)). Potential pathogenic bacteria included *Haemophilus influenzae*, *Streptococcus pneumoniae*, *Moraxella catarrhalis*, Gram-negative bacilli, *Pseudomonas aeruginosa* and *Staphylococcus aureus*. Non-potential pathogenic microorganisms included Viridans group streptococci, *Neisseria* spp, *Candida* spp, *Corynebacterium* spp, *H. parainfluenzae* and coagulase-negative staphylococci and were not considered as clinically significant. These samples were informed as having normal or mixed flora.

### **Extraction of DNA**

Two protocols depending on the type of sample were performed, and they are described in Figure 1. Briefly, samples were concentrated by centrifugation and boiled in DireCtQuant 100W buffer (FrontexBioMed, Ltd. / DireCtQuant, Lleida, Spain) to obtain extracted DNA. This extract was later on used for the LAMP test.

### **LAMP protocol**

Previously described primers (17) were used for *P. aeruginosa*, *A. baumannii*, *K. pneumoniae*, *E. coli*, *S. maltophilia*, and *S. aureus*. The LAMP was performed in 25 µL of reaction mixture: 5 µL primers (0.2µM outer, 1.6µM inner and 0.4µM loop primers), 15 µL Isothermal Master Mix (Optigene) and 5.0µL of extraction product. Once the reaction mix is ready, gentle vortex and centrifugation must be performed. The reaction was conducted in a Versant kPCR (Siemens) at 65°C for 40 minutes for BAL samples and in a Lightcycler (Roche) at 65°C for 30

minutes for EA/BAS. Both protocols can be implemented independently of the thermocycler, but we performed them in two different machines because they were done in different times and changes in laboratory equipment occurred.

### ***Determination of the limits of detection***

Each microorganism was inoculated into negative BAL samples to a final concentration ranging from  $10^7$  to  $10^2$  CFU/mL. For EA/BAS it was not possible to perform the same study for sensitivity due to the consistency of the samples and the physical impossibility of obtaining homogeneous matrix for all the dilutions. Instead, positive samples were used to perform serial 10-fold dilutions in saline buffer. Final concentration for each dilution was based on the approximate initial concentration determined by culture.

### ***Statistical analysis***

Concordance between culture and LAMP results was studied. Major errors were defined as result discrepancies where the microorganism identified by LAMP was completely different from that identified in culture or the detection of a pathogen when the culture had none. Minor errors were defined as concordant results for the major pathogen identification but LAMP identified additional microorganisms.

Diagnostic performance was based on sensitivity, specificity, negative- and positive-predictive values, and accuracy defined as described elsewhere (19, 20). Accuracy was calculated as concordant results over total number analyzed. Cohen's kappa coefficient was also calculated. Statistical analyses were performed using Stata version 15 (Texas, USA).

### ***Ethical aspects.***

The Ethical Committee of the Hospital Clinic of Barcelona, Spain approved the study protocol. The study is registered as HCB/2016/0294.



## Results

### **BAL samples.**

The limit of detection of LAMP for the different pathogens tested in BAL was  $10^2$  CFU/mL for *S. aureus*, *E. coli*, *P. aeruginosa* and *K. pneumoniae*, and  $10^4$  CFU/mL for *S. maltophilia* and *A. baumannii*. No cross-reaction was identified using these primers while testing spiked samples with the other microorganisms included in the study. Regarding the evaluation with clinical samples, the concordance between culture and LAMP results is shown in Table 1. A total of 58 positive BAL samples were tested. All major errors happened due to a low concentration of bacterial in the sample, except for one case in which *A. baumannii* was not detected although with high concentration, and even after repeating the technique. The accuracy of the LAMP assay was of 77.6% or 87.9% if the minor errors were considered as a non-true or true result, respectively (Table 2). In addition, calculation of the clinical sensitivity and specificity yielded 100% (95%CI; 59% to 100%) specificity, a sensitivity of 86.3% (95%CI; 73.7% to 94.3%), a PPV of 100% and a NPV of 50% (95%CI; 33.5% to 66.6%) when minor errors were treated as a true positive sample. The statistical data considering minor errors as a false positive sample is shown in Table 2.

### **BAS/EA samples.**

The estimated limit of detection of the LAMP assay to detect pathogens directly from BAS or EA samples was  $10^2$  CFU/mL for *P. aeruginosa*, *K. pneumoniae* and *A. baumannii*,  $10^3$  CFU/mL for *E. coli*, and  $10^4$  CFU/mL for *S. aureus* and *S. maltophilia*. No cross-reaction was identified using these primers while testing spiked samples with the other microorganisms included in the study. Regarding the evaluation with clinical samples, a total of 83 samples were tested. The accuracy between culture and LAMP results is shown in Table 2 and it was of 95.2% or 72.3%, respectively when the minor errors were considered as true positives or not. In Table 3, the concordance

186 between the LAMP assay and bacterial culture is shown. All major errors happened due to a low  
187 concentration of bacterial in the sample, except for two cases: *S. aureus* with more than 10,000  
188 CFU/mL in culture and *A. baumannii* with 300,000 CFU/mL in culture.

189 Regarding possible amplification inhibitors, a mix of lipidic, hematic, viscous and mucous  
190 samples were used and inoculated with the different microorganisms. No evidence of interference  
191 was observed in any of these prepared samples.

192 Most positive results appeared before 30 minutes, and together with the sample handling  
193 time, the results could be obtained within one-hour time.

194 The sensitivity, specificity, negative and positive predictive values of the LAMP assay to  
195 detect pathogens directly from BAS/EA samples are shown in Table 2. When minor errors were  
196 considered as false positive results, the sensitivity was 68.9% (95%CI; 57.1% to 79.2%), the  
197 specificity was 100% (95%CI; 66.4% to 100%), and the PPV and NPV were of 100% and 28.1%,  
198 respectively. However, when minor errors were considered as true positive the statistical  
199 indicators were: 94.6% (95%CI; 86.7% to 98.5%) sensitivity, 100% (95%CI; 66.4% to 100%)  
200 specificity, 100% PPV and 69.2% (95%CI; 46.5% to 85.4%) NPV (Table 2).

201 The time to positivity of the LAMP test was strongly correlated with the number of  
202 bacterial CFU/ml in culture in EA/BAS samples ( $r = -0.71$ ,  $P < 0.01$ ) but not in BAL samples (Figure 2).  
203 These results suggest that, at least in EA/BAS samples, the time to positivity of LAMP could be  
204 used as a semi-quantitative measure.

## 205 Discussion

206 Although new preventive measures have led to a reduction of HAP incidence, it remains  
207 associated with important morbi-mortality (21). Therefore, it is necessary to introduce new  
208 methods to improve an early diagnosis. Here, we have evaluated the use of LAMP as a rapid  
209 diagnostic tool to identify the main pathogens involved in HAP with promising results.

210 We found an overall accuracy between LAMP and culture of 88% for BAL samples and 95%  
211 for BAS/EA samples. Almost all syndromic tests available to identify pathogens causing respiratory  
212 tract infections include virus and atypical bacteria (22), but not many include the major bacterial  
213 pathogens causing HAP. Furthermore, rapid identification of the pathogen causing VAP is crucial to  
214 improve the patient outcome. In this sense, a multiplex PCR-based syndromic panel including 16  
215 bacterial and one fungal target as well as 22 antimicrobial resistance markers has been evaluated  
216 (23, 24, 25), showing a sensitivity from 60 % to 90% and a turnaround time of circa 4 hours. In our  
217 case, as LAMP is much less affected than PCR by possible inhibitors in the sample (26), in the  
218 condition of high bacteria concentration, no automatic nucleic acid extraction is required, and  
219 therefore we can reduce turnaround including preparation of the sample and LAMP to around 1  
220 hour.

221 Kang *et al.* (17) performed a nationwide study in China in which the qLAMP assay was  
222 compared with culture to detect eight respiratory bacterial pathogens from sputum, detecting  
223 pathogens in 1047 (69.28%) patients from 1533 qualified patients. They used a kit for the nucleic  
224 acid extraction.

225 Cost is also important. We have calculated that the LAMP assay (counting both reagents for  
226 nucleic acid extraction and LAMP together with plastic material) to detect the six pathogens  
227 causing HAP in this study will cost 12€.

228 LAMP may be useful then as a complementary tool to culture, allowing rapid identification  
 229 of the microorganism causing the infection. In addition, a semi-quantitative approach can be used  
 230 extrapolating the time to result with the CFU/ml in BAS and EA. In BAL the data that we had was  
 231 not sufficient to get a significant result (data not shown). If the quantification is under  $10^2$ - $10^3$   
 232 CFU/ml the LAMP will probably not provide a positive result, but in general culture result will be  
 233 considered as colonization in these cases. Therefore, every positive LAMP result should be taken  
 234 into consideration, always taking into account the Gram stain, quality of samples and clinical  
 235 situation of the patient. Culture should not be avoided in any case and LAMP could be  
 236 implemented as a complement to accelerate the diagnosis of HAP.

237 Furthermore, it also seems promising for the detection of resistance genes (27, 28).  
 238 Pathogen identification and potential antibiotic resistance is possible with LAMP, both more  
 239 rapidly identified (1 hour) than with a time consuming (16 to 24 hours) classical phenotypic  
 240 method. And, it could be even faster when applied directly to samples (29).

241 LAMP method may be used to detect the most frequent bacteria causing HAP. It is a  
 242 simple, cheap, sensitive, specific and rapid (circa one hour) assay. Multiplexing targets may  
 243 facilitate the implementation of this technique in routine laboratories. Each laboratory must adapt  
 244 the targets according to its epidemiology.

245 **Conflicts of interest**

246 The authors declare no conflicts of interest.

247

248 **Acknowledgments**

249 This work was supported by Ajut a la Recerca “Clínic-La Pedrera” 2016 (PEP:HB-16-JF-VG-C) and  
 250 from the Instituto de Salud Carlos III, Subdirección General de Redes y Centros de Investigación  
 251 Cooperativa, Ministerio de Economía y Competitividad, Spanish Network for Research in Infectious  
 252 Diseases (REIPI RD16/0016/0010) and was co-financed by European Development Regional Fund  
 253 “A way to achieve Europe”. This work was also supported by award 2017 SGR 0809 from the  
 254 Agència de Gestió d’Ajuts Universitaris i de Recerca of the Generalitat de Catalunya.

## 255     **References**

- 256     1.     Kohbodi GNA, Noor A. Pneumonia, Ventilator-associated. [Updated 2018 Nov 18]. In:  
257             StatPearls [Internet]. Treasure Island (FL): StatPearls Publishing; 2019 Jan-. Available from:  
258             <https://www.ncbi.nlm.nih.gov/books/NBK507711/>
- 259     2.     Li Bassi G, Ferrer M, Marti JD, Comaru T, Torres A. 2014. Ventilator-Associated Pneumonia.  
260             Semin Respir Crit Care Med;35:469-481.
- 261     3.     Torres A, Niederman MS, Chastre J, Ewig S, Fernandez-Vandellos P, Hanberger H, Marin K, Li  
262             Bassi G, Luna CM, Martin-Loeches I, Paiva JA, Read RC, Rigau D, Timsit JF, Welte T,  
263             Wunderink R. 2017. International ERS/ESICM/ESCMID/ALAT guidelines for the management  
264             of hospital-acquired pneumonia and ventilator-associated pneumonia: Guidelines for the  
265             management of hospital-acquired pneumonia (HAP)/ventilator-associated pneumonia (VAP)  
266             of the European Respiratory Society (ERS), European Society of Intensive Care Medicine  
267             (ESICM), European Society of Clinical Microbiology and Infectious Diseases (ESCMID) and  
268             Asociación Latinoamericana del Tórax (ALAT). Eur Respir J 50(3):1700582.
- 269     4.     Aykac K, Ozsurekci Y, Basaranoglu ST. 2017. Future Directions and Molecular Basis of  
270             Ventilator Associated Pneumonia. Can Respir J 2017:2614602.
- 271     5.     Chi SY, Kim TO, Park CW, Yu JY, Lee B, Lee HS, Kim YH, Lim SC, Kwon YS. 2012. Bacterial  
272             pathogens of ventilator associated pneumonia in a tertiary referral hospital. Tuberc Respir  
273             Dis 73(1):32-37.
- 274     6.     Injac V, Batranovic U, Matijasevic J, Vukoja M, Hadnadjev M, Bukumiric Z, Trajkovic G,  
275             Jankovic S. 2017. Etiology and resistance patterns of bacteria causing ventilator-associated  
276             pneumonia in a respiratory intensive care unit. Vojnosanit Pregl 74(10):954-962.

- 277 7. Ferrer M, Difrancesco LF, Liapikou A, Rinaudo M, Carbonara M, Li Bassi G, Gabarrus A,  
278 Torres A. 2015. Polymicrobial intensive care unit-acquired pneumonia: prevalence,  
279 microbiology and outcome. *Crit Care* 19:450.
- 280 8. Bouza E, Giannella M, Torres MV, Catalán P, Sánchez-Carrillo C, Hernandez RI, Muñoz P;  
281 Gregorio Marañón Task Force for Pneumonia. 2011. Herpes simplex virus: a marker of  
282 severity in bacterial ventilator-associated pneumonia. *J Crit Care* 26(4):432.e1-6.
- 283 9. Osman NM, Sayed NM, Abdel-Rahman SM, Hamza SA, Abd al Aziz AA. 2014. The impact of  
284 cytomegalovirus infection on mechanically ventilated patients in the respiratory and  
285 geriatric intensive care units. *Egypt J Chest Dis Tuberc* 63(1):239-245.
- 286 10. Klompas M. 2007. Does this patient have ventilator-associated pneumonia? *JAMA*  
287 297(14):1583-1593.
- 288 11. Kalanuria AA, Zai W, Mirski M. 2014. Ventilator-associated pneumonia in the ICU. *Crit Care*  
289 18(2):208.
- 290 12. Herkel T, Uvizl R, Doubravska L, Adamus M, Gabrhelik T, Htoutou Sedlakova M, Kolarc M,  
291 Hanulic V, Pudovac V, Langovad K, Zazulae R, Rezace T, Moravece M, Cermakf P, Sevcikg P,  
292 Staseki J, Malaskai J, Sevcikovaj A, Hanslianovaj M, Turekk Z, Cernyk V, Paterova P. 2016.  
293 Epidemiology of hospital-acquired pneumonia: Results of a Central European multicenter,  
294 prospective, observational study compared with data from the European region. *Biomed*  
295 *Pap* 160(3):448-455.
- 296 13. Roberts KL, Micek ST, Juang P, Kollef MH. 2017. Controversies and advances in the  
297 management of ventilator associated pneumonia. *Expert Rev Respir Med* 11(11):875-884.

- 298 14. Millot G, Voisin B, Loiez C, Wallet F, Nseir S. 2017. The next generation of rapid point-of-  
299 care testing identification tools for ventilator-associated pneumonia. *Ann Transl Med*  
300 5(22):451.
- 301 15. Notomi T, Okayama H, Masubuchi H, Yonekawa T, Watanabe K, Amino N, Hase T. 2000.  
302 Loop-mediated isothermal amplification of DNA. *Nucleic Acids Res* 28:E63.
- 303 16. Dhama K, Karthik K, Chakrabort S, Tiwari R, Kapoor S, Kumar A, Thomas P. 2014. Loop-  
304 mediated Isothermal Amplification of DNA (LAMP): A New Diagnostic Tool Lights the World  
305 of Diagnosis of Animal and Human Pathogens: A Review. *Pakistan J Biol Sci* 17(2):151-166.
- 306 17. Kang Y, Deng R, Wang C, Deng T, Peng P, Cheng X, Wang G, Qian M, Gao H, Han B,  
307 Chen Y, Hu Y, Geng R, Hu C, Zhang W, Yang J, Wan H, Yu Q, Wei L, Li J, Tian G,  
308 Wang Q, Hu K, Wang S, Wang R, Du J, He B, Ma J, Zhong X, Mu L, Cai S, Zhu X,  
309 Xing W, Yu J, Deng M, Gao Z. 2012. Etiologic Diagnosis of Lower Respiratory Tract  
310 Bacterial Infections Using Sputum Samples and Quantitative Loop-Mediated Isothermal  
311 Amplification. *PLoS One* 7(6):e38743.
- 312 18. Petrone BL, Wolff BJ, DeLaney AA, Diaz MH, Winchell JM. 2015. Isothermal Detection of  
313 *Mycoplasma pneumoniae* Directly from Respiratory Clinical Specimens. *J Clin Microbiol*  
314 53(9):2970-2976.
- 315 19. Altman DG, Bland JM. 1994. Diagnostic tests. 1: Sensitivity and specificity. *BMJ*  
316 308(6943):1552.
- 317 20. Altman DG, Bland JM. 1994. Diagnostic tests 2: Predictive values. *BMJ* 309(6947):102.
- 318 21. Bassi G, Senussi T, Aguilera E. 2017. Prevention of ventilator-associated pneumonia. *Curr*  
319 *Opin Infect Dis* 30(2):214-220.



- 320 22. Torres A, Lee N, Cilloniz C, Vila J, Van der Eerden M. 2016. Laboratory diagnosis of  
321 pneumonia in the molecular age. *Eur Respir J* 48:1764-1778.
- 322 23. Jamal W, Al Roomi E, AbdulAziz LR, Rotimi VO. 2014. Evaluation of Curetis Unyvero, a  
323 Multiplex PCR-Based Testing System, for Rapid Detection of Bacteria and Antibiotic  
324 Resistance and Impact of the Assay on Management of Severe Nosocomial Pneumonia. *J*  
325 *Clin Microbiol* 52(7):2487-2492.
- 326 24. Kunze N, Moerer O, Steinmetz N, Schulze MH, Quintel M, Perl T. 2015. Point-of-care  
327 multiplex PCR promises short turnaround times for microbial testing in hospital-acquired  
328 pneumonia – an observational pilot study in critical ill patients. *Ann Clin Microbiol*  
329 *Antimicrob* 14:33.
- 330 25. Ozongwu C, Personne Y, Platt G, Jeanes C, Aydin S, Kozato N, Gant V, O’Grady J, Enne VI.  
331 2017. The Unyvero P55 ‘sample-in, answer-out’ pneumonia assay: A performance  
332 evaluation. *Biomol Detect Quantif* 13:1-6.
- 333 26. Kaneko H, Kawana T, Fukushima E, Suzutani T. 2007. Tolerance of loop-mediated isothermal  
334 amplification to a culture medium and biological substances. *J Biochem Biophys Methods*  
335 70(3):499-501.
- 336 27. Vergara A, Zboromyrska Y, Mosqueda N, Morosini MI, García-Fernández S, Roca I, Cantón R,  
337 Marco F, Vila J. 2014. Evaluation of a Loop-Mediated Isothermal Amplification-Based  
338 Methodology To Detect Carbapenemase Carriage in *Acinetobacter* Clinical Isolates.  
339 *Antimicrob Agents Chemother* 58(12):7538-7540.
- 340 28. Garcia-Fernandez S, Morosini MI, Marco F, Gijón D, Vergara A, Vila J, Ruiz-Carbajosa P,  
341 Cantón R. 2015. Evaluation of the eazyplex(R) SuperBug CRE system for rapid detection of

- 342 carbapenemases and ESBLs in clinical *Enterobacteriaceae* isolates recovered at two Spanish  
 343 hospitals. J Antimicrob Chemother 70(4):1047-1050.
- 344 29. Zboromyrska Y, Vergara A, Cosgaya C, Verger G, Mosqueda N, Almela M, Pitart C, Roca I,  
 345 Marco F, Vila J. 2015. Rapid detection of  $\beta$ -lactamases directly from positive blood cultures  
 346 using a loop-mediated isothermal amplification (LAMP)-based assay. Int J Antimicrob Agents  
 347 46(3):355-356.

348 **Figure legends.**

349

350 **Figure 1. Sample preparation workflow for bronchoalveolar lavage (BAL) and**  
 351 **bronchoaspirate/endotracheal aspirate (BAS/EA).**

352

353 **Figure 2. Correlation of time to positivity and bacterial load in culture.** Scatter plot shows time to  
 354 result (in minutes) against number of CFU/mL (log10). Trend line displays best fit of all data points  
 355 and the 95% CI for the prediction. Vertical reference lines indicate time points. BAS/EA:  
 356 bronchoaspirate/endotracheal aspirate.

# Tables

**Table 1. LAMP results from BAL samples according to the result obtained by culture.**

| Microorganisms identified by culture | N         | Concordance | Minor errors       | Major errors     | Comments                                                                                                                                      |
|--------------------------------------|-----------|-------------|--------------------|------------------|-----------------------------------------------------------------------------------------------------------------------------------------------|
| <i>S. aureus</i>                     | 19        | 15          | 2 <sup>A,B</sup>   | 2 <sup>C,D</sup> | <sup>A</sup> LAMP: SAUR+SMAL detected<br><sup>B</sup> LAMP: SAUR+PAER detected (GNB in gram stain)<br><sup>C,D</sup> Culture: Few CFU of SAUR |
| <i>P. aeruginosa</i>                 | 11        | 9           | -                  | 2 <sup>E,F</sup> | <sup>E</sup> Culture: < 1000 CFU of PAER, LAMP: SAUR detected<br><sup>F</sup> Culture: <1000 CFU of PAER, LAMP negative                       |
| <i>S. maltophilia</i>                | 6         | 6           | -                  | -                | -                                                                                                                                             |
| <i>K. pneumoniae</i>                 | 4         | 2           | -                  | 2 <sup>G</sup>   | <sup>G</sup> Culture: <1000 CFU of KPNE (two cases)                                                                                           |
| <i>E. coli</i>                       | 3         | 3           | -                  | -                | -                                                                                                                                             |
| <i>A. baumannii</i>                  | 2         | 1           | -                  | 1 <sup>H</sup>   | <sup>H</sup> Culture: 100,000 CFU of ABAU                                                                                                     |
| Negative                             | 7         | 6           | 1 <sup>I</sup>     | -                | <sup>I</sup> LAMP: KPNE detected (GNB in gram stain)                                                                                          |
| Mixed flora                          | 6         | 3           | 3 <sup>J,K,L</sup> | -                | <sup>J</sup> LAMP:PAER detected<br><sup>K</sup> LAMP:SAUR detected<br><sup>L</sup> LAMP:KPNE detected                                         |
| <b>TOTAL</b>                         | <b>58</b> | <b>45</b>   | <b>6</b>           | <b>7</b>         |                                                                                                                                               |

359

360 N: number of samples tested by culture and LAMP; SAUR: *S. aureus*; SMAL: *S. maltophilia*; PAER: *P.*  
361 *aeruginosa*; KPNE: *K pneumoniae*; ECOL: *E. coli*; ABAU: *A. baumannii*; GNB: Gram-negative bacilli.

**Table 2. Statistics of the use of LAMP to detect pathogens directly from BAL and BAS/EA samples.**

| BAL                      | Minor error as wrong |           | Minor error as right |           |
|--------------------------|----------------------|-----------|----------------------|-----------|
|                          | Value (%)            | 95%CI     | Value (%)            | 95%CI     |
| <b>Sensitivity</b>       | 76.5                 | 62.5-87.2 | 86.3                 | 73.7-94.3 |
| <b>Specificity</b>       | 85.7                 | 42.1-99.6 | 100                  | 59-100    |
| <b>PPV</b>               | 97.5                 | 86.3-99.6 | 100                  |           |
| <b>NPV</b>               | 33.3                 | 21.9-47.2 | 50                   | 33.5-66.6 |
| <b>Accuracy</b>          | 77.6                 | 64.7-87.5 | 87.9                 | 76.7-95   |
| <b>Kappa coefficient</b> | 43.3                 | 17.9-68.8 | 70.9                 | 51.5-90.2 |
| <b>BAS/EA</b>            |                      |           |                      |           |
| <b>Sensitivity</b>       | 68.9                 | 57.1-79.2 | 94.6                 | 86.7-98.5 |
| <b>Specificity</b>       | 100                  | 66.3-100  | 100                  | 66.4-100  |
| <b>PPV</b>               | 100                  |           | 100                  |           |
| <b>NPV</b>               | 28.1                 | 21.8-35.5 | 69.2                 | 46.5-85.4 |
| <b>Accuracy</b>          | 72.3                 | 61.4-81.6 | 95.2                 | 88.1-98.7 |
| <b>Kappa coefficient</b> | 46.3                 | 29.2-63.5 | 89.7                 | 80-99.5   |

BAL: bronchoalveolar lavage; BAS: bronchoaspirate; EA: endotraqueal aspirate; PPV: positive predictive value; NPV: negative predictive value; CI: confidence interval.

368 **Table 3. LAMP results from BAS/EA samples according to the result obtained by culture.**

| Microorganisms identified by culture | N         | Concordance | Minor errors         | Major errors   | Comments                                                                                                                                                                                                       |
|--------------------------------------|-----------|-------------|----------------------|----------------|----------------------------------------------------------------------------------------------------------------------------------------------------------------------------------------------------------------|
| <i>K. pneumoniae</i>                 | 13        | 10          | 3 <sup>A,B</sup>     | -              | <sup>A</sup> LAMP: KPNE and ECOL detected (two cases)<br><sup>B</sup> LAMP: KPNE and PAER detected                                                                                                             |
| <i>S. aureus</i>                     | 10        | 7           | 2 <sup>C,D</sup>     | 1 <sup>E</sup> | <sup>C</sup> LAMP: SAUR and KPNE detected<br><sup>D</sup> LAMP: SAUR and ECOL detected<br><sup>E</sup> Culture: <1000 CFU of SAUR                                                                              |
| <i>P. aeruginosa</i>                 | 11        | 9           | 2 <sup>F</sup>       | -              | <sup>F</sup> LAMP: PAER and ECOL detected (two cases)                                                                                                                                                          |
| <i>E. coli</i>                       | 8         | 3           | 5 <sup>G,H,I,J</sup> | -              | <sup>G</sup> LAMP: ECOL and PAER detected<br><sup>H</sup> LAMP: ECOL, PAER, SAUR and SMAL detected<br><sup>I</sup> LAMP: ECOL and KPNE detected<br><sup>J</sup> LAMP: ECOL, PAER and SMAL detected (two cases) |
| <i>S. maltophilia</i>                | 2         | 2           | -                    | -              | -                                                                                                                                                                                                              |
| Polymicrobial                        | 10        | 3           | 4                    | 3              | See table in supplementary material.                                                                                                                                                                           |
| Other                                | 10        | 7           | 3 <sup>K,L,M</sup>   | -              | <sup>K</sup> LAMP: ECOL and KPNE detected<br><sup>L</sup> LAMP: PAER detected<br><sup>M</sup> LAMP: PAER, SAUR and SMAL detected                                                                               |
| Mixed flora                          | 10        | 10          | -                    | -              | -                                                                                                                                                                                                              |
| Negative                             | 9         | 9           | -                    | -              | -                                                                                                                                                                                                              |
| <b>TOTAL</b>                         | <b>83</b> | <b>60</b>   | <b>19</b>            | <b>4</b>       |                                                                                                                                                                                                                |

369

370 N: number of samples tested by culture and LAMP; KPNE: *K pneumoniae*; ECOL: *E. coli*; PAER: *P.*  
371 *aeruginosa*; SAUR: *S. aureus*; SMAL: *S. maltophilia*.

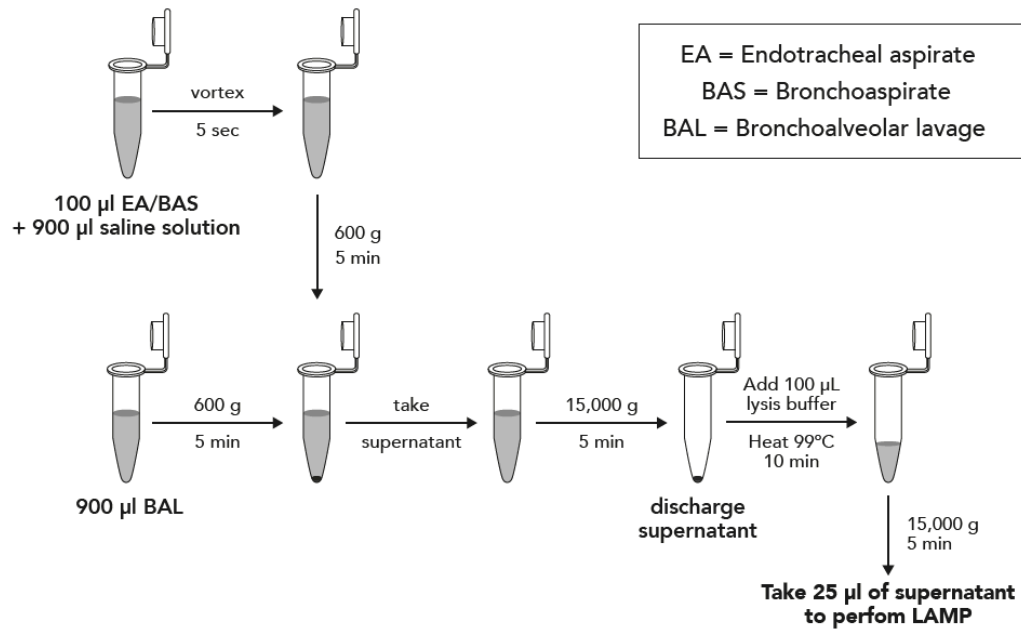

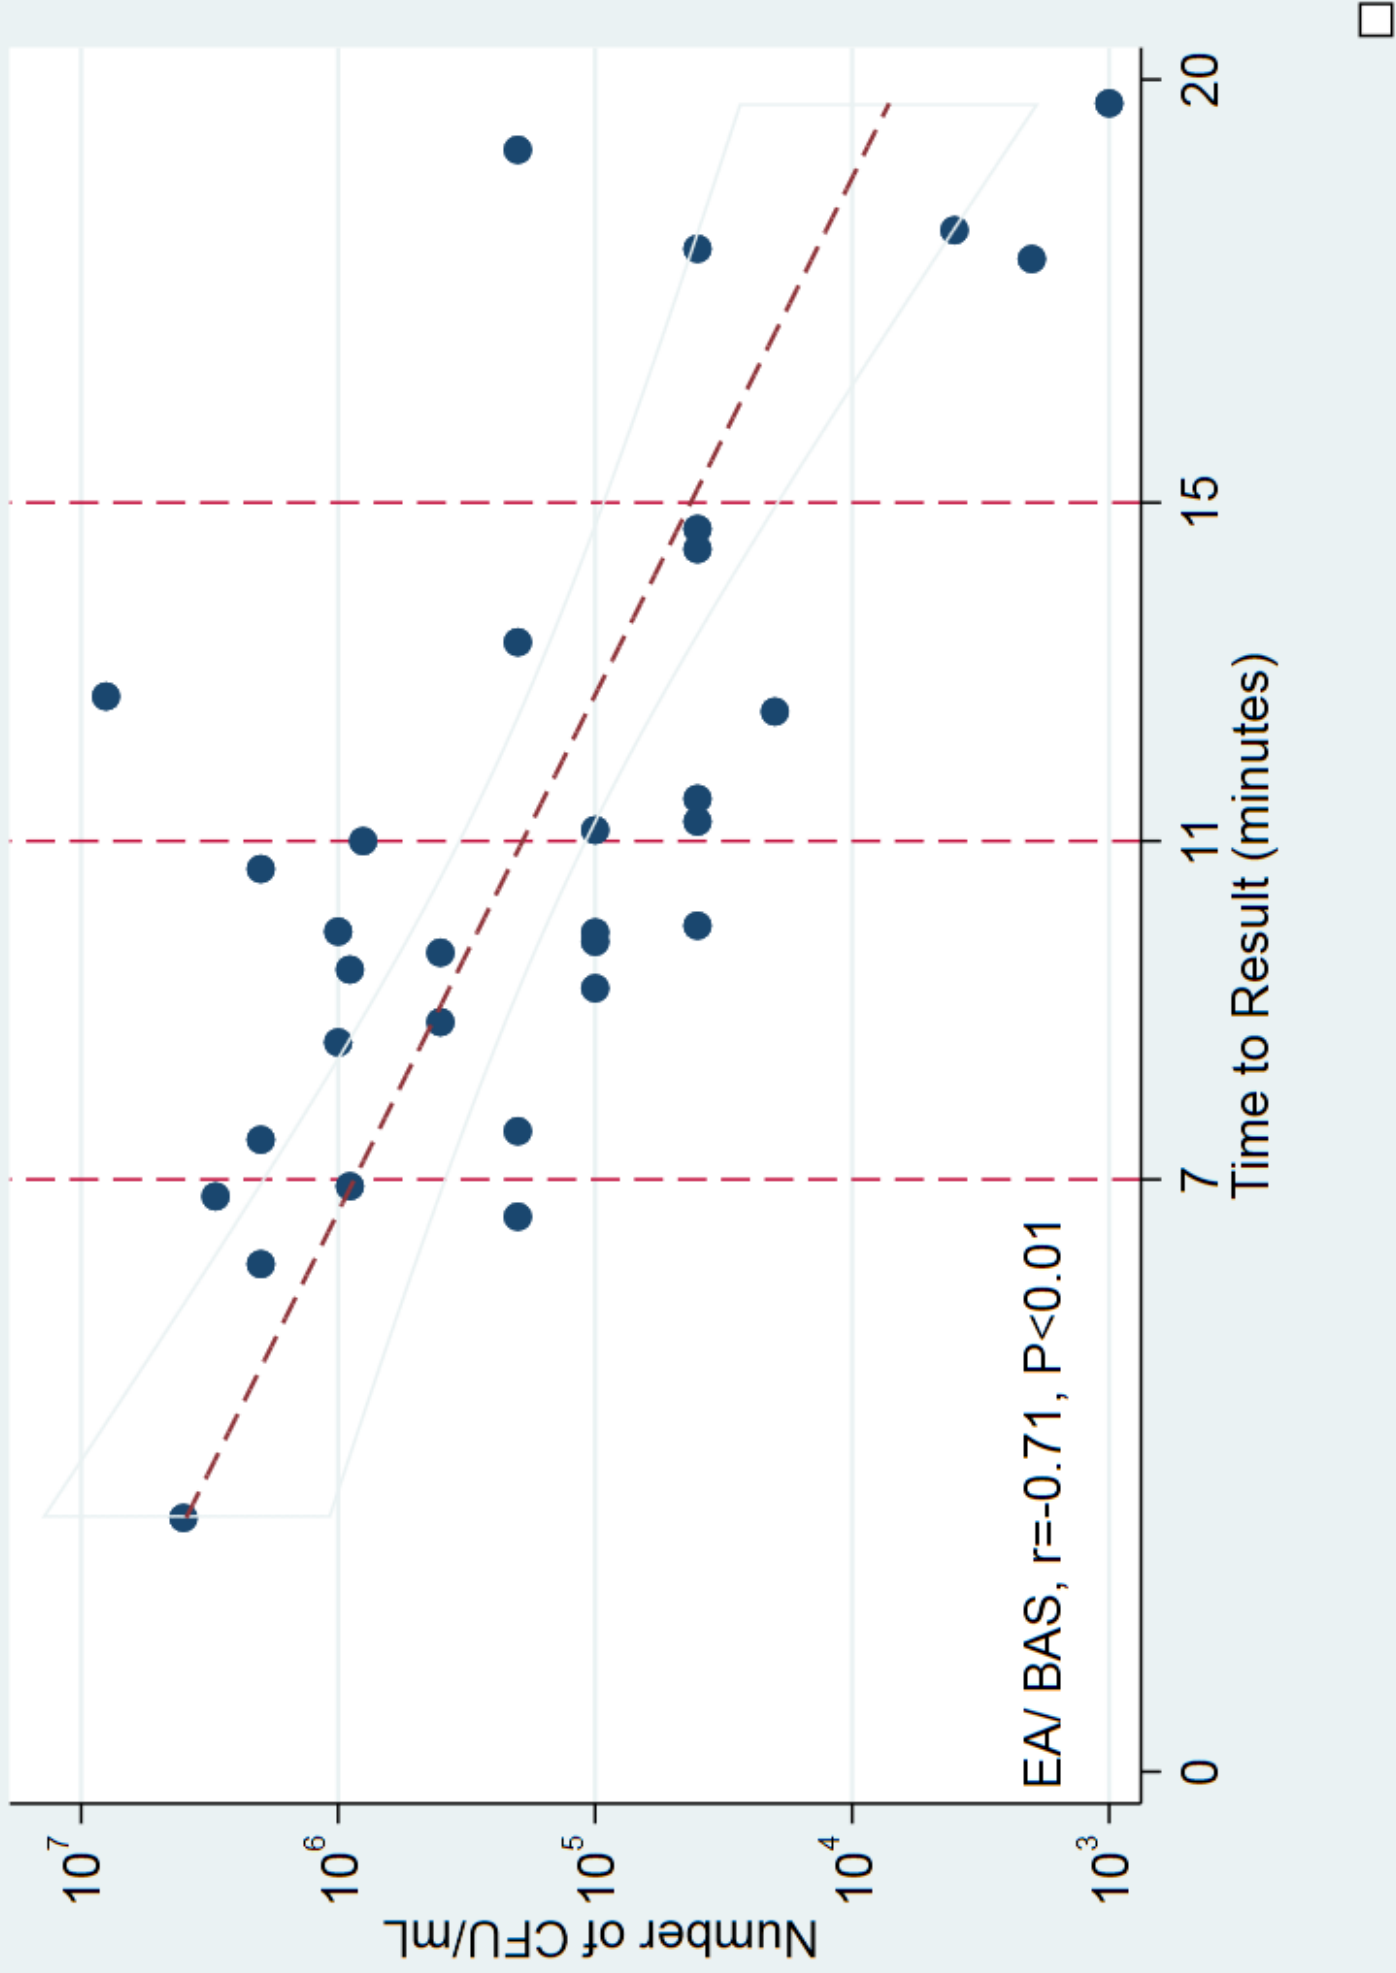

Source: http://biorxiv.org/cgi/reprint/714709v1
